# Supplementary material for: Discordance in investigator-reported and adjudicated sudden death in TIOSPIR
Source: PubMed Central journal article supplement — ERJ Open Res. 2017 Mar 20;3(1):00073-2016. doi: 10.1183/23120541.00073-2016 (PMC5358526; doi:10.1183/23120541.00073-2016), 2017-03-20
Supplement: 00073-2016_Mueller.pdf [file 00073-2016_Mueller.pdf]

To view the full contents of this document, you need a later version of the PDF viewer. You can upgrade to the latest version of Adobe Reader from [www.adobe.com/products/acrobat/readstep2.html](http://www.adobe.com/products/acrobat/readstep2.html)

For further support, go to [www.adobe.com/support/products/acrreader.html](http://www.adobe.com/support/products/acrreader.html)
